# Supplementary material for: Differences in Gut Microbiome Composition between Senior Orienteering Athletes and Community-Dwelling Older Adults
Source: Nutrients. 2020 Aug 27;12(9):2610. doi: 10.3390/nu12092610 (PMC7551621; doi:10.3390/nu12092610)
Supplement: Supplementary file 1 [file nutrients-12-02610-s001.zip › Table_S1.xlsx]

## Sheet: Table_S1 Genus
Genus	Raw_pval	Relative_Abundcance_All	Relative_Abundcance_GE	Relative_Abundcance_Ori
Faecalibacterium	0.00107248	15.6384	14.5799	18.2847
Parasutterella	0.00116999	0.0562935	0.0757513	0.00764893
Bilophila	0.00132889	0.749524	0.877984	0.428375
Paraprevotella	0.00387305	0.191882	0.238556	0.0751961
Bacteroides	0.00811931	8.42556	8.94756	7.12056
Methanobrevibacter	0.0160244	0.350674	0.436363	0.136453
Oscillibacter	0.0214753	1.57202	1.72345	1.19345
Lactobacillus	0.0234876	0.516823	0.660895	0.156642
Clostridiaceae_noname	0.0349854	0.075852	0.100409	0.0144607
Haemophilus	0.0414269	1.00576	0.681333	1.81682
Catenibacterium	0.0475773	0.0128492	0.0179889	0
Atopobium	0.0584185	0.00745857	0.010442	0
Lachnospiraceae_noname	0.0694644	1.56138	1.68129	1.26162
Fusobacterium	0.0775154	0.040886	0.0572404	0
Escherichia	0.0786215	1.61104	1.89994	0.888787
Anaerofustis	0.0871881	0.0431729	0.060442	0
Eggerthella	0.0967238	0.320997	0.383083	0.165784
Enterobacter	0.0971941	0.0290781	0.0407093	0
Sutterellaceae_unclassified	0.0999361	0.0319411	0.0119169	0.0820018
Actinomyces	0.115152	0.0358391	0.047763	0.00602929
Coprobacillus	0.116621	0.219907	0.26532	0.106375
Phascolarctobacterium	0.117327	0.116271	0.15253	0.0256243
Porphyromonas	0.127754	0.00487541	0.00682557	0
C2likevirus	0.130165	0.189864	0.22071	0.112751
Barnesiella	0.131267	0.432397	0.477804	0.318881
Odoribacter	0.13496	0.128531	0.0909101	0.222583
Flavonifractor	0.136962	0.0416813	0.0494041	0.0223743
Mitsuokella	0.13982	0.00954255	0.0133596	0
Burkholderiales_noname	0.145394	0.0334091	0.0403031	0.0161739
Veillonella	0.158522	1.24725	1.03046	1.78923
Gardnerella	0.163638	0.0190961	0.0267346	0
Parvimonas	0.168057	0.0253417	0.0354784	0
Pediococcus	0.170745	0.00837878	0.0117303	0
Parabacteroides	0.170803	2.14491	2.25365	1.87308
Collinsella	0.175652	1.85634	1.6987	2.25042
Akkermansia	0.182033	0.871137	0.957741	0.654628
Peptostreptococcus	0.192532	0.00803286	0.0111416	0.000261071
Alloscardovia	0.200174	0.00630622	0.00882871	0
Granulicatella	0.209181	0.00839418	0.0107721	0.00244929
Anaerococcus	0.211359	0.010968	0.0153551	0
Olsenella	0.211617	0.0122012	0.0170817	0
Cetobacterium	0.213527	0.000278265	0.000389571	0
Enterococcus	0.218943	0.0585746	0.0729504	0.022635
Clostridium	0.221114	1.896	2.05793	1.49118
Pseudoflavonifractor	0.233823	0.0665997	0.0790657	0.0354346
Bacteroidales_noname	0.243146	0.480318	0.512284	0.400403
Siphoviridae_noname	0.248057	1.23068	1.0166	1.76589
Saccharomyces	0.259392	0.00101347	0.00141886	0
Solobacterium	0.26461	0.0105421	0.014759	0
Marvinbryantia	0.268483	0.0322552	0.044475	0.00170571
Klebsiella	0.300224	0.136282	0.163764	0.0675764
Roseburia	0.300337	4.08454	3.93979	4.44642
Dorea	0.303736	2.79979	2.70567	3.03506
Alloprevotella	0.320805	0.00118724	0.00166214	0
Bacteroidetes_noname	0.320805	0.00448204	0.00627486	0
Butyricicoccus	0.320805	0.0173533	0.0242946	0
Campylobacter	0.320805	9.12245e-05	0.000127714	0
Epsilon15likevirus	0.320805	0.000918265	0.00128557	0
Facklamia	0.320805	0.000491531	0.000688143	0
Finegoldia	0.320805	0.00702173	0.00983043	0
Megasphaera	0.320805	0.00137306	0.00192229	0
Parascardovia	0.320805	4.03061e-05	5.64286e-05	0
Pseudomonas	0.320805	0.00671673	0.00940343	0
Pseudoramibacter	0.320805	0.00852071	0.011929	0
Pyramidobacter	0.320805	0.000264388	0.000370143	0
Treponema	0.320805	0.0102351	0.0143291	0
Arcobacter	0.320805	0.0107326	0.0150256	0
Proteus	0.320805	0.000228571	0.00032	0
Succinatimonas	0.320805	0.00636	0.008904	0
Actinobacillus	0.326189	0.00159449	0	0.00558071
Acidaminococcaceae_unclassified	0.326189	0.00428949	0	0.0150132
Aggregatibacter	0.326189	0.000522041	0	0.00182714
Morganella	0.326189	0.000871633	0	0.00305071
Gemella	0.343966	0.0149616	0.00253557	0.0460268
Butyricimonas	0.350599	0.0130336	0.00199343	0.0406339
Clostridiales_Family_XIII_Incertae_Sedis_unclassified	0.350639	0.0104214	0.0119301	0.00664964
Coprococcus	0.38508	1.90453	1.83698	2.07341
Subdoligranulum	0.387412	12.6512	12.4479	13.1595
Butyrivibrio	0.39489	0.293031	0.330748	0.198738
Anaerotruncus	0.39625	0.126058	0.142622	0.0846468
Peptostreptococcaceae_noname	0.42695	1.65406	1.58411	1.82896
Holdemania	0.439486	0.360895	0.384053	0.303
Adlercreutzia	0.489302	0.287292	0.272068	0.32535
Citrobacter	0.513444	0.0179113	0.0109186	0.0353932
Dialister	0.516664	0.811029	0.873537	0.654759
Streptococcus	0.528689	3.53182	3.73315	3.02847
Desulfovibrio	0.545983	0.0444814	0.048994	0.0332
Prevotella	0.586433	0.72007	0.667132	0.852413
Propionibacterium	0.595495	0.054977	0.061256	0.0392796
Turicibacter	0.599212	0.311171	0.291454	0.360466
Dermatophilaceae_unclassified	0.626746	0.020073	0.022479	0.0140579
Oxalobacter	0.632972	0.079978	0.0853033	0.0666646
Methanosphaera	0.650783	0.0374029	0.0328421	0.0488046
Ruminococcaceae_noname	0.676403	0.131255	0.141168	0.106472
Anaerostipes	0.689018	0.21128	0.218722	0.192676
Leuconostoc	0.692215	0.103405	0.0952629	0.123761
Bifidobacterium	0.700805	2.8085	2.8661	2.66449
Blautia	0.701659	7.98804	8.06111	7.80536
Rothia	0.731332	0.0230032	0.0198536	0.0308771
Coprobacter	0.755005	0.268165	0.259719	0.289281
Eubacterium	0.768744	6.70341	6.63662	6.8704
Acidaminococcus	0.796842	0.0327608	0.0304161	0.0386225
Gordonibacter	0.799765	0.118454	0.12262	0.10804
Lactococcus	0.80238	0.161205	0.155116	0.176429
Sutterella	0.835687	0.71748	0.702506	0.754917
Erysipelotrichaceae_noname	0.895252	0.732054	0.720934	0.759853
Alistipes	0.931981	4.82258	4.81054	4.85268
Ruminococcus	0.933479	1.55236	1.54549	1.56953
Slackia	0.959111	0.0308309	0.0303987	0.0319114
Peptoniphilus	0.968956	0.00159653	0.00162143	0.00153429
Clostridiales_noname	0.981106	0.096691	0.0963583	0.0975229

## Sheet: Table_S1 Species
Species	Raw_pval	Relative_Abundcance_All	Relative_Abundcance_GE	Relative_Abundcance_Ori
Faecalibacterium_prausnitzii	0.00107248	15.6384	14.5799	18.2847
Parasutterella_excrementihominis	0.00116999	0.0562935	0.0757513	0.00764893
Bilophila_unclassified	0.00152885	0.695161	0.812486	0.40185
Lachnospiraceae_bacterium_1_1_57FAA	0.00269497	0.201632	0.263543	0.0468525
Bacteroides_uniformis	0.00600533	2.19435	2.46139	1.52676
Paraprevotella_unclassified	0.00792675	0.167545	0.204484	0.0751961
Erysipelotrichaceae_bacterium_21_3	0.0186021	0.0172763	0.022836	0.00337714
Oscillibacter_unclassified	0.0214753	1.57202	1.72345	1.19345
Erysipelotrichaceae_bacterium_2_2_44A	0.02306	0.0354945	0.0491313	0.0014025
Desulfovibrio_desulfuricans	0.0253294	0.0251924	0.0352694	0
Streptococcus_mutans	0.0292078	0.0444601	0.0617597	0.00121107
Methanobrevibacter_smithii	0.0310715	0.30088	0.373382	0.119625
Eubacterium_ramulus	0.0319325	0.73741	0.634846	0.993821
Alistipes_indistinctus	0.0324364	0.515532	0.420578	0.752916
Clostridiaceae_bacterium_JC118	0.0349854	0.075852	0.100409	0.0144607
Haemophilus_parainfluenzae	0.039451	0.994711	0.668256	1.81085
Paraprevotella_clara	0.0395853	0.0211051	0.0295471	0
Clostridium_hathewayi	0.0400492	0.111662	0.139953	0.0409361
Erysipelotrichaceae_bacterium_3_1_53	0.0404692	0.0574503	0.0804304	0
Streptococcus_vestibularis	0.0429668	0.103601	0.140954	0.0102204
Streptococcus_anginosus	0.0441237	0.0510552	0.0702174	0.00314964
Lactobacillus_plantarum	0.0467	0.11419	0.14803	0.02959
Catenibacterium_mitsuokai	0.0475773	0.0128492	0.0179889	0
Peptostreptococcaceae_noname_unclassified	0.0524485	0.563489	0.446003	0.857204
Methanobrevibacter_unclassified	0.0546785	0.0497942	0.0629806	0.0168282
Klebsiella_unclassified	0.0571152	0.040063	0.0560881	0
Lachnospiraceae_bacterium_5_1_57FAA	0.0576424	0.0263227	0.0368517	0
Streptococcus_gordonii	0.0615342	0.0258054	0.0341691	0.00489607
Anaerostipes_unclassified	0.0640582	0.064433	0.0902061	0
Ruminococcus_champanellensis	0.0696609	0.0422252	0.00147329	0.144105
Lactococcus_raffinolactis	0.0697136	0.0296391	0.0414947	0
Dorea_longicatena	0.0700809	0.932118	0.84226	1.15676
Clostridium_ramosum	0.0714783	0.0420406	0.0520119	0.0171125
Erysipelotrichaceae_bacterium_6_1_45	0.0728169	0.0283056	0.0396279	0
Veillonella_parvula	0.0732258	0.463833	0.353823	0.738857
Bifidobacterium_dentium	0.075601	0.147939	0.18258	0.0613368
Bacteroides_intestinalis	0.0768955	0.0814694	0.0457836	0.170684
Fusobacterium_nucleatum	0.0775154	0.040886	0.0572404	0
Bilophila_wadsworthia	0.081516	0.0543629	0.0654981	0.0265246
Bifidobacterium_angulatum	0.0837811	0.00363092	0	0.0127082
Eggerthella_unclassified	0.0850476	0.283811	0.340913	0.141056
Anaerofustis_stercorihominis	0.0871881	0.0431729	0.060442	0
Enterococcus_faecalis	0.0935145	0.0283787	0.0397301	0
Paraprevotella_xylaniphila	0.0952502	0.00323214	0.004525	0
Bacteroides_xylanisolvens	0.0958864	0.270628	0.231717	0.367906
Escherichia_coli	0.10128	1.08033	1.26595	0.616282
Enterobacter_cloacae	0.10266	0.00566704	0.00793386	0
Atopobium_vaginae	0.10517	0.00470602	0.00658843	0
Lactobacillus_delbrueckii	0.106954	0.0800458	0.101343	0.0268021
Lachnospiraceae_bacterium_3_1_46FAA	0.116115	0.169807	0.193833	0.109743
Coprobacillus_unclassified	0.116621	0.219907	0.26532	0.106375
Escherichia_unclassified	0.117092	0.530709	0.633991	0.272505
Phascolarctobacterium_succinatutens	0.117327	0.116271	0.15253	0.0256243
Streptococcus_infantis	0.118109	0.0129223	0.0180913	0
Gemella_sanguinis	0.121714	0.00181112	0.00253557	0
Ruminococcus_torques	0.12262	3.76169	3.94603	3.30085
Porphyromonas_asaccharolytica	0.127754	0.00487541	0.00682557	0
C2likevirus_unclassified	0.130165	0.189864	0.22071	0.112751
Barnesiella_intestinihominis	0.131267	0.432397	0.477804	0.318881
Flavonifractor_plautii	0.136962	0.0416813	0.0494041	0.0223743
Clostridium_leptum	0.138848	0.759616	0.827683	0.58945
Mitsuokella_unclassified	0.13982	0.00954255	0.0133596	0
Bacteroides_caccae	0.140546	0.428118	0.4857	0.284162
Clostridium_innocuum	0.14316	0.0124889	0.0174844	0
Burkholderiales_bacterium_1_1_47	0.145394	0.0334091	0.0403031	0.0161739
Odoribacter_unclassified	0.14596	0.0821516	0.06188	0.132831
Bacteroides_thetaiotaomicron	0.152281	0.634321	0.695118	0.48233
Leuconostoc_unclassified	0.15243	0.00286112	0.00400557	0
Prevotella_bivia	0.156467	0.0264418	0.0370186	0
Bacteroides_dorei	0.156678	0.793311	0.876834	0.584504
Pediococcus_acidilactici	0.158809	0.00485592	0.00679829	0
Lactobacillus_ultunensis	0.158888	0.0104686	0.014656	0
Parvimonas_unclassified	0.159807	0.0199645	0.0279503	0
Actinomyces_graevenitzii	0.159846	0.00366	0.005124	0
Prevotella_stercorea	0.161323	0.00576857	0.008076	0
Butyrivibrio_unclassified	0.162145	0.00422459	0.00591443	0
Streptococcus_australis	0.162605	0.135907	0.157632	0.0815932
Collinsella_aerofaciens	0.162677	1.84173	1.67946	2.24742
Gardnerella_vaginalis	0.163638	0.0190961	0.0267346	0
Alistipes_putredinis	0.172084	0.880718	0.95316	0.699614
Eubacterium_cylindroides	0.173956	0.151138	0.113669	0.244808
Enterobacter_aerogenes	0.174511	0.023411	0.0327754	0
Collinsella_intestinalis	0.174788	0.0134849	0.0188789	0
Parabacteroides_merdae	0.174827	0.573721	0.628272	0.437342
Anaerostipes_hadrus	0.174948	0.146173	0.127572	0.192676
Actinomyces_turicensis	0.176854	0.0242134	0.0338987	0
Akkermansia_muciniphila	0.182033	0.871137	0.957741	0.654628
Streptococcus_sanguinis	0.184565	0.0288849	0.0391176	0.00330321
Bacteroides_stercoris	0.196086	0.524815	0.627811	0.267325
Actinomyces_viscosus	0.198434	0.00316684	0.00443357	0
Alloscardovia_omnicolens	0.200174	0.00630622	0.00882871	0
Dialister_succinatiphilus	0.202077	0.0182349	0.0255289	0
Bacteroides_faecis	0.20435	0.121514	0.141459	0.0716518
Coprococcus_eutactus	0.207837	0.113276	0.0835266	0.187651
Parabacteroides_unclassified	0.207954	0.77922	0.843487	0.618553
Roseburia_unclassified	0.20829	1.65334	1.47534	2.09832
Collinsella_unclassified	0.208649	0.000855918	0	0.00299571
Haemophilus_sputorum	0.209275	0.00170765	0	0.00597679
Lactobacillus_mucosae	0.212036	0.00527041	0.00737857	0
Cetobacterium_somerae	0.213527	0.000278265	0.000389571	0
Bifidobacterium_pseudocatenulatum	0.216897	0.0310057	0.0397693	0.00909679
Granulicatella_unclassified	0.223003	0.00790663	0.0100896	0.00244929
Lactobacillus_gasseri	0.225055	0.0538516	0.0753923	0
Rothia_unclassified	0.225237	0.00300112	0.00420157	0
Erysipelotrichaceae_bacterium_5_2_54FAA	0.225587	0.0332087	0.0424639	0.0100707
Eubacterium_limosum	0.226578	0.0241645	0.0338303	0
Coprococcus_comes	0.230665	0.880662	0.826234	1.01673
Pseudoflavonifractor_capillosus	0.233823	0.0665997	0.0790657	0.0354346
Anaerococcus_vaginalis	0.235492	0.00662837	0.00927971	0
Prevotella_disiens	0.237633	0.00500796	0.00701114	0
Lactobacillus_oris	0.242424	0.00658224	0.00921514	0
Bacteroidales_bacterium_ph8	0.243146	0.480318	0.512284	0.400403
Lactobacillus_salivarius	0.250217	0.0457526	0.0640536	0
Alistipes_finegoldii	0.25107	0.186203	0.202071	0.146534
Lactobacillus_vaginalis	0.252591	0.0259846	0.0363784	0
Olsenella_unclassified	0.256122	0.00279673	0.00391543	0
Parvimonas_micra	0.257346	0.00537724	0.00752814	0
Saccharomyces_cerevisiae	0.259392	0.00101347	0.00141886	0
Bacteroides_eggerthii	0.262056	0.413718	0.467434	0.27943
Solobacterium_moorei	0.26461	0.0105421	0.014759	0
Klebsiella_oxytoca	0.267388	0.00312878	0.00438029	0
Streptococcus_thermophilus	0.267505	0.418017	0.374908	0.52579
Leuconostoc_lactis	0.267521	0.00652071	0.009129	0
Marvinbryantia_formatexigens	0.268483	0.0322552	0.044475	0.00170571
Lactobacillus_fermentum	0.275937	0.021623	0.0302721	0
Holdemania_filiformis	0.277683	0.25929	0.286574	0.19108
Lachnospiraceae_bacterium_5_1_63FAA	0.27825	0.207629	0.190755	0.249815
Prevotella_timonensis	0.280168	0.00230429	0.003226	0
Lactobacillus_acidophilus	0.280943	0.0640766	0.078378	0.0283232
Bacteroides_clarus	0.288388	0.0723549	0.0602123	0.102711
Lactococcus_phage_P680	0.295206	0.861865	0.706082	1.25133
Lachnospiraceae_bacterium_7_1_58FAA	0.295381	0.105467	0.11347	0.08546
Streptococcus_tigurinus	0.300249	0.0033301	0.00466214	0
Haemophilus_pittmaniae	0.3006	0.00934071	0.013077	0
Veillonella_unclassified	0.303247	0.583085	0.508335	0.76996
Lactobacillus_sakei	0.31517	0.00588776	0	0.0206071
Actinomyces_cardiffensis	0.320805	5.35714e-05	7.5e-05	0
Alloprevotella_unclassified	0.320805	0.00118724	0.00166214	0
Anaerococcus_obesiensis	0.320805	0.00289582	0.00405414	0
Anaerococcus_tetradius	0.320805	0.00144378	0.00202129	0
Anaerostipes_caccae	0.320805	0.000673776	0.000943286	0
Atopobium_minutum	0.320805	0.000958673	0.00134214	0
Atopobium_parvulum	0.320805	0.00179388	0.00251143	0
Bacteroides_fluxus	0.320805	0.00718459	0.0100584	0
Bacteroides_sp_3_2_5	0.320805	0.0161949	0.0226729	0
Bacteroidetes_bacterium_oral_taxon_272	0.320805	0.00448204	0.00627486	0
Bifidobacterium_pseudolongum	0.320805	0.0168077	0.0235307	0
Butyricicoccus_pullicaecorum	0.320805	0.0173533	0.0242946	0
Campylobacter_hominis	0.320805	9.12245e-05	0.000127714	0
Collinsella_stercoris	0.320805	0.000260306	0.000364429	0
Coprococcus_sp_ART55_1	0.320805	0.0440196	0.0616274	0
Epsilon15likevirus_unclassified	0.320805	0.000918265	0.00128557	0
Eubacterium_brachy	0.320805	0.0149545	0.0209363	0
Facklamia_unclassified	0.320805	0.000491531	0.000688143	0
Finegoldia_magna	0.320805	0.00702173	0.00983043	0
Granulicatella_adiacens	0.320805	0.000487551	0.000682571	0
Lactobacillus_antri	0.320805	0.0108078	0.0151309	0
Lactobacillus_crispatus	0.320805	0.000276735	0.000387429	0
Lactobacillus_malefermentans	0.320805	0.000163673	0.000229143	0
Lactobacillus_reuteri	0.320805	0.00020602	0.000288429	0
Lactococcus_phage_BM13	0.320805	0.0159118	0.0222766	0
Lactococcus_phage_bIL312	0.320805	0.0354579	0.049641	0
Lactococcus_phage_phi7	0.320805	0.0525243	0.073534	0
Megasphaera_elsdenii	0.320805	0.00137306	0.00192229	0
Olsenella_uli	0.320805	0.00940449	0.0131663	0
Parascardovia_denticolens	0.320805	4.03061e-05	5.64286e-05	0
Pediococcus_lolii	0.320805	0.000733265	0.00102657	0
Pediococcus_unclassified	0.320805	0.00278959	0.00390543	0
Peptoniphilus_harei	0.320805	0.000206429	0.000289	0
Peptostreptococcus_anaerobius	0.320805	0.00531765	0.00744471	0
Peptostreptococcus_unclassified	0.320805	0.00199806	0.00279729	0
Prevotella_buccae	0.320805	0.00217867	0.00305014	0
Pseudomonas_aeruginosa	0.320805	0.00263582	0.00369014	0
Pseudomonas_unclassified	0.320805	0.00408082	0.00571314	0
Pseudoramibacter_alactolyticus	0.320805	0.00852071	0.011929	0
Pyramidobacter_piscolens	0.320805	0.000264388	0.000370143	0
Rothia_dentocariosa	0.320805	0.00093949	0.00131529	0
Ruminococcus_flavefaciens	0.320805	0.00147133	0.00205986	0
Streptococcus_agalactiae	0.320805	0.0135335	0.0189469	0
Streptococcus_constellatus	0.320805	0.00688704	0.00964186	0
Treponema_succinifaciens	0.320805	0.0102351	0.0143291	0
Arcobacter_butzleri	0.320805	0.0107326	0.0150256	0
Lactobacillus_johnsonii	0.320805	0.004615	0.006461	0
Proteus_mirabilis	0.320805	0.000228571	0.00032	0
Succinatimonas_hippei	0.320805	0.00636	0.008904	0
Actinobacillus_unclassified	0.326189	0.00159449	0	0.00558071
Gemella_unclassified	0.326189	0.000251327	0	0.000879643
Aggregatibacter_segnis	0.326189	0.000522041	0	0.00182714
Eubacterium_dolichum	0.326189	0.013929	0	0.0487514
Lactococcus_phage_jm2	0.326189	0.0686951	0	0.240433
Leuconostoc_phage_P793	0.326189	0.0171189	0	0.0599161
Morganella_morganii	0.326189	0.000871633	0	0.00305071
Gemella_morbillorum	0.326189	0.0128992	0	0.0451471
Odoribacter_laneus	0.330243	0.0114921	0.00250214	0.0339671
Roseburia_hominis	0.330505	0.761615	0.798732	0.668823
Clostridium_asparagiforme	0.335527	0.17907	0.199865	0.127081
Veillonella_atypica	0.342881	0.159185	0.130174	0.231714
Butyricimonas_synergistica	0.350599	0.0130336	0.00199343	0.0406339
Bacteroides_fragilis	0.354453	0.311867	0.282222	0.385981
Desulfovibrio_piger	0.358609	0.019289	0.0137246	0.0332
Bacteroides_plebeius	0.364968	0.052985	0.0252343	0.122362
Bacteroides_nordii	0.378133	0.0621147	0.0698181	0.0428561
Subdoligranulum_unclassified	0.387412	12.6512	12.4479	13.1595
Parabacteroides_johnsonii	0.400643	0.127525	0.100388	0.195367
Lachnospiraceae_bacterium_8_1_57FAA	0.413458	0.511443	0.534881	0.452848
Butyrivibrio_crossotus	0.416693	0.288806	0.324834	0.198738
Clostridium_symbiosum	0.420231	0.20819	0.231932	0.148835
Eggerthella_lenta	0.425494	0.0371866	0.0421699	0.0247286
Ruminococcus_obeum	0.430181	3.56646	3.49098	3.75516
Eubacterium_hallii	0.434477	1.01608	1.05426	0.920633
Prevotella_nigrescens	0.43789	0.0145121	0.00673043	0.0339664
Citrobacter_unclassified	0.442837	0.0117352	0.00558057	0.0271218
Anaerotruncus_colihominis	0.448388	0.0941143	0.108152	0.0590196
Lactococcus_lactis	0.449708	0.131566	0.113621	0.176429
Streptococcus_mitis_oralis_pneumoniae	0.453521	0.0190391	0.00970029	0.0423861
Ruminococcus_bromii	0.461039	0.917818	0.9679	0.792612
Bifidobacterium_bifidum	0.469435	0.175362	0.156679	0.222069
Clostridium_bartlettii	0.476285	1.09058	1.1381	0.971758
Bacteroides_finegoldii	0.479016	0.168279	0.147938	0.219133
Adlercreutzia_equolifaciens	0.489302	0.287292	0.272068	0.32535
Peptostreptococcus_stomatis	0.497433	0.000717143	0.000899571	0.000261071
Bacteroides_vulgatus	0.497576	0.911357	0.95528	0.801552
Clostridium_citroniae	0.503546	0.0600376	0.0669173	0.0428382
Lachnospiraceae_bacterium_3_1_57FAA_CT1	0.512747	0.168926	0.187674	0.122054
Clostridium_bolteae	0.513821	0.348954	0.377768	0.276917
Prevotella_copri	0.52327	0.663856	0.60202	0.818447
Bacteroides_coprophilus	0.525982	0.0492906	0.0564359	0.0314275
Ruminococcus_callidus	0.526136	0.157335	0.142691	0.193945
Clostridium_perfringens	0.535721	0.0291794	0.020528	0.0508079
Alistipes_onderdonkii	0.549094	0.580665	0.614749	0.495456
Bifidobacterium_animalis	0.559454	0.0880326	0.072326	0.127299
Dialister_invisus	0.56707	0.792794	0.848008	0.654759
Bifidobacterium_adolescentis	0.57546	1.43461	1.49684	1.27904
Turicibacter_sanguinis	0.580989	0.134562	0.124382	0.160013
Bifidobacterium_catenulatum	0.594789	0.0242961	0.0274633	0.0163782
Bacteroides_salyersiae	0.59541	0.0978979	0.0859493	0.127769
Propionibacterium_freudenreichii	0.595495	0.054977	0.061256	0.0392796
Rothia_mucilaginosa	0.602385	0.0190626	0.0143367	0.0308771
Bacteroides_cellulosilyticus	0.603714	0.366283	0.346765	0.415077
Leuconostoc_pseudomesenteroides	0.605684	0.0326629	0.0279591	0.0444221
Eubacterium_biforme	0.610332	0.340722	0.303279	0.434331
Dorea_formicigenerans	0.61335	1.23121	1.20357	1.30031
Streptococcus_salivarius	0.628125	1.78628	1.8647	1.59023
Oxalobacter_formigenes	0.632972	0.079978	0.0853033	0.0666646
Leuconostoc_mesenteroides	0.633653	0.0440556	0.036992	0.0617146
Odoribacter_splanchnicus	0.638349	0.0348871	0.026528	0.055785
Methanosphaera_stadtmanae	0.650783	0.0374029	0.0328421	0.0488046
Turicibacter_unclassified	0.655643	0.176609	0.167072	0.200453
Eubacterium_ventriosum	0.665592	0.245476	0.233671	0.27499
Klebsiella_pneumoniae	0.667476	0.0930904	0.103296	0.0675764
Bifidobacterium_longum	0.66816	0.886814	0.866913	0.936566
Clostridium_celatum	0.674322	0.0251484	0.0201364	0.0376782
Ruminococcaceae_bacterium_D16	0.676403	0.131255	0.141168	0.106472
Alistipes_unclassified	0.676801	1.87917	1.83346	1.99346
Ruminococcus_gnavus	0.684484	0.482549	0.456263	0.548265
Lactobacillus_ruminis	0.687556	0.03291	0.0362667	0.0245182
Veillonella_dispar	0.697534	0.0411513	0.0381327	0.0486979
Streptococcus_parasanguinis	0.698883	0.882093	0.928652	0.765694
Anaerotruncus_unclassified	0.70213	0.0319435	0.03447	0.0256271
Bacteroides_coprocola	0.702669	0.0695823	0.0637353	0.0842
Eubacterium_sp_3_1_31	0.704262	0.0754861	0.0674839	0.0954918
Actinomyces_odontolyticus	0.706102	0.00474541	0.00423186	0.00602929
Parabacteroides_goldsteinii	0.713614	0.464191	0.485373	0.411237
Lachnospiraceae_bacterium_2_1_58FAA	0.736182	0.0114097	0.010394	0.0139489
Enterococcus_faecium	0.747597	0.0301959	0.0332203	0.022635
Coprobacter_fastidiosus	0.755005	0.268165	0.259719	0.289281
Dorea_unclassified	0.765115	0.636459	0.659846	0.577993
Citrobacter_freundii	0.766934	0.00617612	0.005338	0.00827143
Lactobacillus_casei_paracasei	0.774437	0.0341106	0.0370341	0.0268018
Alistipes_shahii	0.775689	0.590379	0.599627	0.56726
Lachnospiraceae_bacterium_1_4_56FAA	0.778369	0.158748	0.149888	0.180897
Roseburia_inulinivorans	0.779866	0.902618	0.888361	0.938261
Bacteroides_ovatus	0.783837	0.650351	0.660437	0.625135
Acidaminococcus_unclassified	0.796842	0.0327608	0.0304161	0.0386225
Blautia_producta	0.797344	0.0445024	0.0400727	0.0555768
Gordonibacter_pamelaeae	0.799765	0.118454	0.12262	0.10804
Holdemania_unclassified	0.828812	0.101605	0.0974784	0.11192
Eubacterium_eligens	0.830027	0.658984	0.647289	0.688222
Sutterella_wadsworthensis	0.835687	0.71748	0.702506	0.754917
Roseburia_intestinalis	0.837444	0.766971	0.777354	0.741015
Alistipes_senegalensis	0.838733	0.189909	0.186897	0.197438
Lactococcus_phage_936_sensu_lato	0.841064	0.179107	0.165064	0.214214
Parabacteroides_distasonis	0.841728	0.200257	0.196128	0.210581
Blautia_hydrogenotrophica	0.875098	0.132834	0.127767	0.145504
Clostridium_nexile	0.89997	0.0386637	0.0373181	0.0420275
Clostridiales_bacterium_1_7_47FAA	0.901506	0.0508268	0.0494841	0.0541836
Bacteroides_pectinophilus	0.918948	0.0458642	0.0468741	0.0433393
Peptoniphilus_lacrimalis	0.921165	0.0013901	0.00133243	0.00153429
Eubacterium_rectale	0.930945	2.99166	3.00895	2.94845
Ruminococcus_lactaris	0.950752	0.433508	0.431363	0.438872
Eubacterium_siraeum	0.95531	0.939201	0.935367	0.948786
Slackia_piriformis	0.959111	0.0308309	0.0303987	0.0319114
Coprococcus_catus	0.981875	0.866575	0.865594	0.869026
Leuconostoc_carnosum	0.984863	0.0173049	0.0171771	0.0176243
Clostridium_clostridioforme	0.990759	0.13548	0.135828	0.134608
Bacteroides_massiliensis	0.999444	0.12757	0.127555	0.127606
